# Supplementary material for: Na2CO3-responsive mechanisms in halophyte Puccinellia tenuiflora roots revealed by physiological and proteomic analyses
Source: PubMed Central journal article supplement (PMC5011731; doi:10.1038/srep32717), 2016-09-06
Supplement: srep32717-s1.pdf [file srep32717-s1.pdf]

# **Na<sub>2</sub>CO<sub>3</sub>-responsive mechanisms in halophyte *Puccinellia tenuiflora* roots revealed by physiological and proteomic analyses**

Qi Zhao<sup>1,2</sup>, Jinwei Suo<sup>2</sup>, Sixue Chen<sup>3</sup>, Yudan Jin<sup>2</sup>, Xiaolin Ma<sup>2</sup>, Zepeng Yin<sup>2</sup>, Yuhong Zhang<sup>1</sup>, Tai Wang<sup>4</sup>, Ji Luo<sup>5</sup>, Wenhai Jin<sup>5</sup>, Xia Zhang<sup>4</sup>, Zhiqiang Zhou<sup>1,#</sup> & Shaojun Dai<sup>1,2,\*</sup>

<sup>1</sup>Key Laboratory of Forest Plant Ecology, Ministry of Education, Northeast Forestry University, Harbin 150040, China;

<sup>2</sup>Alkali Soil Natural Environmental Science Center, Northeast Forestry University, Key Laboratory of Saline-alkali Vegetation Ecology Restoration in Oil Field, Ministry of Education, Harbin 150040, China;

<sup>3</sup>Department of Biology, Genetics Institute, Plant Molecular and Cellular Biology Program, Interdisciplinary Center for Biotechnology Research, University of Florida, Gainesville, FL 32610, USA;

<sup>4</sup>Institute of Botany, Chinese Academy of Sciences, Beijing 100093, China;

<sup>5</sup>AB Sciex Asia Pacific Application Support Center, Shanghai 200233, China

**\*Correspondence:** Professor Shaojun Dai, Northeast Forestry University, Harbin 150040, China

**Tel:** 86-451-82192237; **Fax:** 86-451-82192237

**E-mail:** daishaojun@hotmail.com

**#Co-corresponding author Tel:** 86-451-82190338; **Fax:** 86-451-82190338

**E-mail:** zhiqiangzhou@hotmail.com

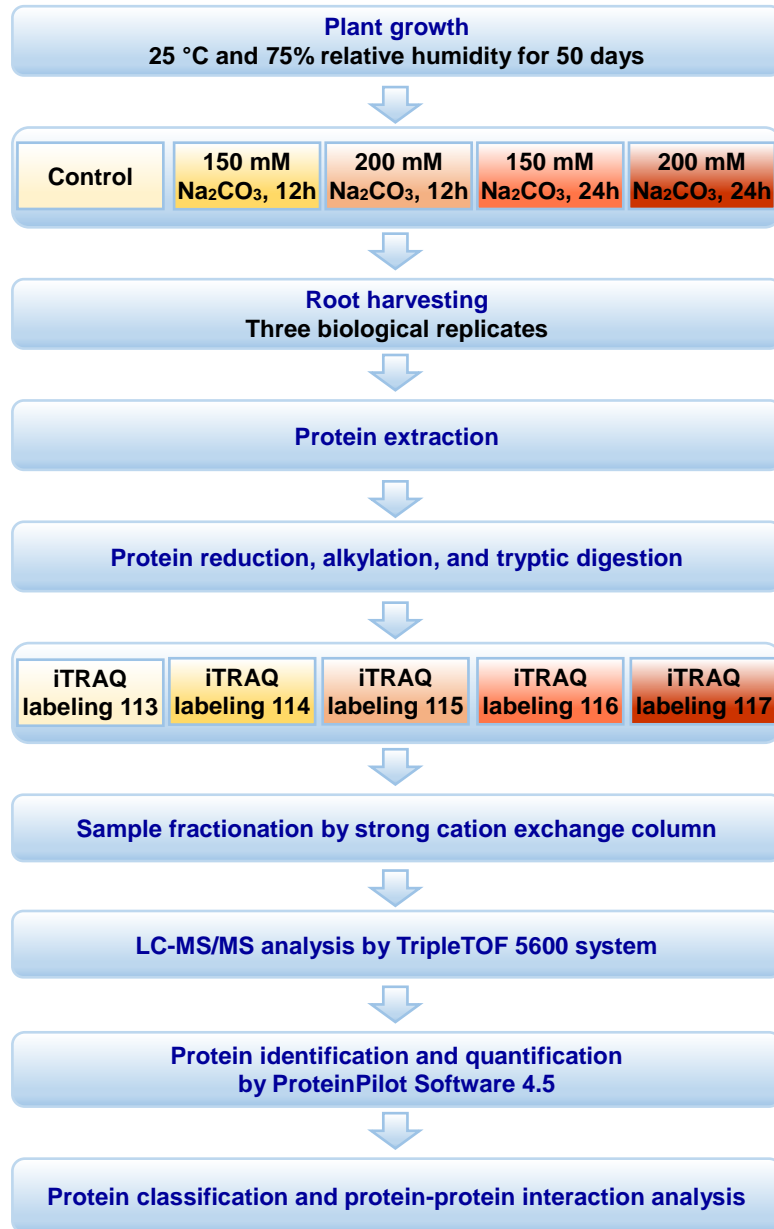

Supplementary Figure S1. iTRAQ-based proteomics strategy for analysis of  $\text{Na}_2\text{CO}_3$ -responsive proteins in *Puccinellia tenuiflora* roots



***Puccinellia tenuiflora* (PtCDPK)**. The Gi numbers of AtCPK6 and OsCDPK7, and encoding unigene name of PtCDPK were listed on the left side. Completely conserved residues among all three proteins were presented in red fonts and marked with asterisks in the consensus line. The dot indicates conserved region between two proteins. Conserved residues between PtCDPK and AtCPK6/OsCDPK7 were presented in blue fonts.
